# Supplementary material for: Development of a high-throughput real time PCR based on a hot-start alternative for Pfu mediated by quantum dots
Source: Royal Society of Chemistry journal article supplement (doi:10.1039/c5nr03596a), 2015-01-01

**Figure S1.** Real time PCR analysis of the second round amplification of a 963 bp target from human genomic DNA after 1h preincubation at 50 °C using a SYBR Green I detection system. Pfu DNA polymerase was used. a: linear amplification data for control without QDs; b: linear amplification data with QDs; c: standard curve for control without QDs; d: melting curve analysis for control without QDs; e: melting curve analysis with QDs; f: standard curve with QDs; g: agarose gel (1.2%) electrophoresis of qPCR products for different template dilutions. Lane M: MW DL2000.

**Figure S2.** Real time PCR analysis of the second round amplification of a 963 bp target from human genomic DNA after 1h preincubation at 50 °C using a SYBR Green I detection system. Taq DNA polymerase was used. a: linear amplification data for control without QDs; b: linear amplification data with QDs; c: standard curve for control without QDs; d: melting curve analysis for control without QDs; e: agarose gel (1.2 %) electrophoresis of real time PCR products for different template dilutions. Lane M: MW DL2000.

Figure S1

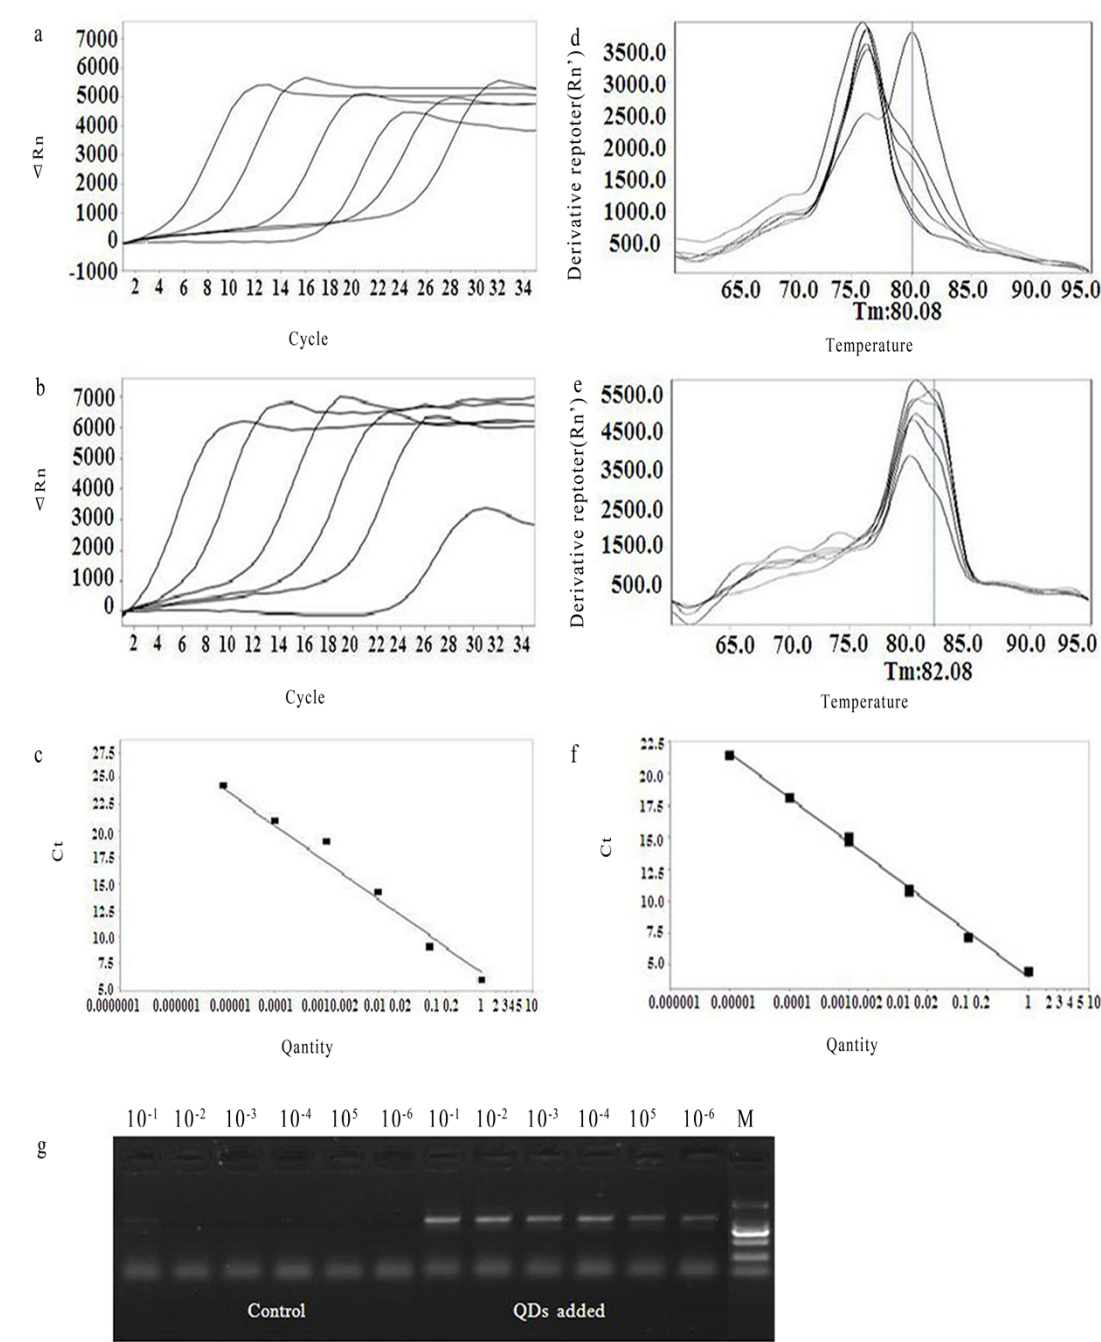

**Figure S2**

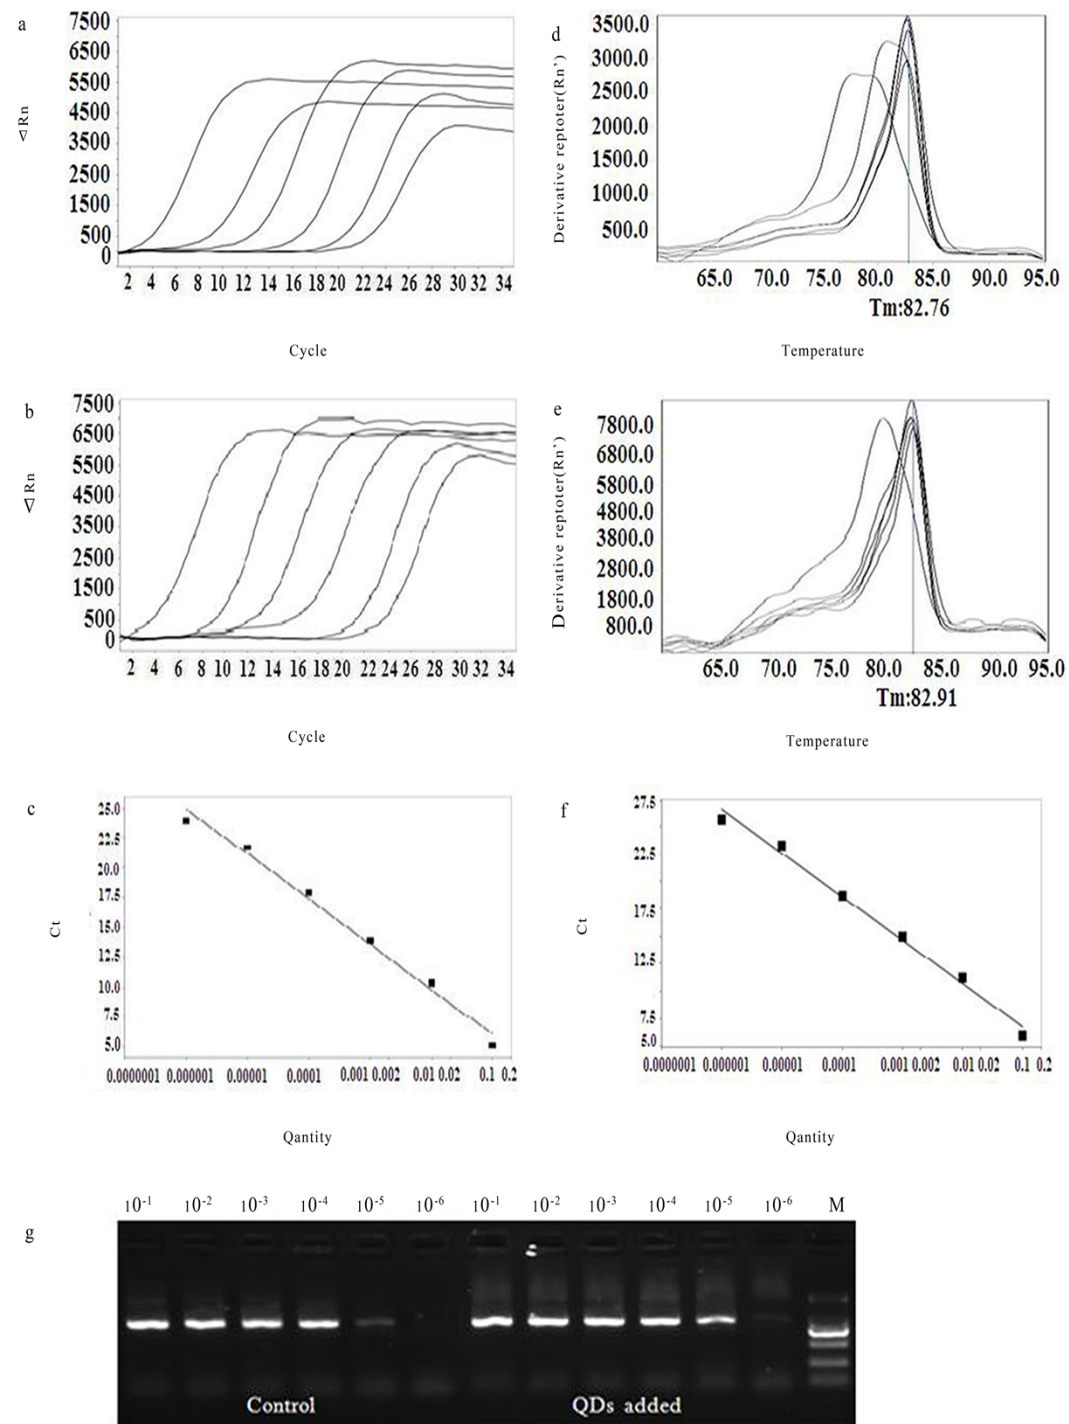

Supplement: c5nr03596a1.pdf [file c5nr03596a1.pdf]
